# Supplementary material for: COVID-19 Vaccine Acceptance and Its Determinants among Migrants in Germany—Results of a Cross-Sectional Study
Source: MDPI journal article supplement (doi:10.3390/vaccines10081350), 2022-08-18
Supplement: s1 [file s1]

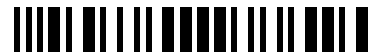

## Teil A: A – Experience with COVID-19

At the beginning we would like to know what your experiences are in regard to COVID-19.

**A1. Have you ever been infected with COVID-19?**

Yes ☐

No ☐

**A2. If you have been infected with COVID-19: How severe was the infection?**

I was tested positive, but I didn't experience any symptoms ☐

I've had mild symptoms (like a cold) ☐

I've had severe symptoms (like influenza) ☐

I was hospitalized (but did not need artificial ventilation) ☐

I was hospitalized and needed artificial ventilation ☐

**A3. Have people in your family or in your circle of friends been infected with COVID-19?**

Yes ☐

No ☐

## Teil B: B – Vaccination status

Now we are going to ask you a few questions about the vaccination against COVID-19.

**B1. Are you vaccinated against COVID-19?**

Yes, at least the first dose ☐

No, but I already have an appointment for the vaccination ☐

No, and I don't have an appointment for the vaccination ☐

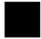

My insurance status makes it difficult for me to get the COVID-19 vaccination.

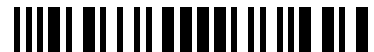

## Teil C: C – Willingness to get vaccinated

Next we would like to know what you think about vaccination against COVID-19.

**C1. How strongly do you agree or disagree with the following statements regarding the vaccination against COVID-19 (regardless of your own vaccination status)?**

|                                                        | 1 Strongly agree         | 2                        | 3                        | 4                        | 5                        | 6                        | 7 strongly disagree      | no answer                | I don't know             |
|--------------------------------------------------------|--------------------------|--------------------------|--------------------------|--------------------------|--------------------------|--------------------------|--------------------------|--------------------------|--------------------------|
| I think the vaccination against COVID-19 is sensible.  | <input type="checkbox"/> |
| I'm concerned about potential side effects.            | <input type="checkbox"/> |
| I think the COVID-19 vaccine may not be safe.          | <input type="checkbox"/> |
| I don't think that COVID-19 is dangerous to my health. | <input type="checkbox"/> |
| I am against vaccination in general.                   | <input type="checkbox"/> |
| The best way is to let nature take its course.         | <input type="checkbox"/> |
| I believe natural or traditional remedies.             | <input type="checkbox"/> |
| I'm afraid of injections.                              | <input type="checkbox"/> |
| I refuse vaccination for religious reasons.            | <input type="checkbox"/> |

**C2. In your opinion, what other reasons speak against a COVID-19 vaccination?**

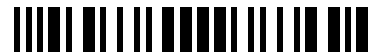

**C3. With which of the available vaccines would you want to be vaccinated/have you been vaccinated?**

BioNTech /Pfizer ☐

Moderna ☐

AstraZeneca ☐

Johnson & Johnson ☐

I don't want to be vaccinated. ☐

Other/combination of different vaccines: ☐

Other/combination of different vaccines:

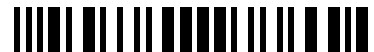

## Teil D: D – Attitude towards vaccination

Now we would like to know what you are thinking about vaccination in general.

### D1. Please indicate whether you disagree or agree with each of the following statements about childhood vaccine.

|                                                                                              | 1 Strongly agree         | 2                        | 3                        | 4                        | 5                        | 6                        | 7 strongly disagree      | no answer                | I don't know             |
|----------------------------------------------------------------------------------------------|--------------------------|--------------------------|--------------------------|--------------------------|--------------------------|--------------------------|--------------------------|--------------------------|--------------------------|
| Vaccines are safe.                                                                           | <input type="checkbox"/> |
| Vaccines contain dangerous ingredients.                                                      | <input type="checkbox"/> |
| Some vaccines are unnecessary since they target relatively harmless diseases.                | <input type="checkbox"/> |
| Vaccines are effective at preventing diseases.                                               | <input type="checkbox"/> |
| In Germany, children are given the right number of vaccines.                                 | <input type="checkbox"/> |
| In Germany, children are given too many vaccines.                                            | <input type="checkbox"/> |
| Vaccines conflict with my belief that children should use natural products and avoid toxins. | <input type="checkbox"/> |
| Vaccines are a major advancement for humanity.                                               | <input type="checkbox"/> |
| The government should not force children to get vaccinated to attend school.                 | <input type="checkbox"/> |
| To protect public health, we should follow government guidelines about vaccines.             | <input type="checkbox"/> |

### D2. Have you been vaccinated in the past five years? (not against COVID-19, but against another disease.)

|     |                          |
|-----|--------------------------|
| Yes | <input type="checkbox"/> |
| No  | <input type="checkbox"/> |

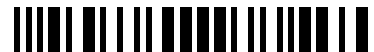

## Teil E: E – Status and sources of information

Now we would like to know how you found out about the COVID-19 vaccination and how satisfied you are with the information available.

### E1. How often do you inform yourself about the COVID-19 vaccination?

Never ☐

Partly ☐

Very often ☐

### E2. Where do you get your information about the COVID-19 vaccination? (Multiple answers possible)

Press, television, radio ☐

Internet (in general) ☐

Health authorities (Robert-Koch-Institute, ministry of health, etc.) ☐

Social media (Facebook, Twitter, Blogs) ☐

Conversations with family, friends, other acquaintances ☐

Doctor, pharmacy ☐

Instant-messenger-service (WhatsApp, Signal, Telegram) ☐

I don't inform myself. ☐

Other: ☐

Other:

### E3. How well would you say you feel informed about the COVID-19 vaccination?

Very good ☐

Rather good ☐

Moderate ☐

Rather bad ☐

Bad ☐



How long do you think COVID-19 will continue?

0 a short time      1      2      3      4      5      6      7      8      9      10 a long time

[ ] [ ] [ ] [ ] [ ] [ ] [ ] [ ] [ ] [ ] [ ]

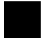

**F3.**

How much control do you think you have  
over COVID-19?

0 Absolute ly no control

1 2 3 4 5 6 7 8 9 10 Full control

Diagram illustrating a 10-bit absolute control signal. The signal is represented as a horizontal row of 10 square boxes, each containing a dot. Above the boxes are labels: '0 Absolute ly no control' above the first box, and '10 Full control' above the last box. Between the boxes are labels 1 through 9. Dotted lines connect the boxes.

**F4.**

How much do you think existing treatments help patients with COVID-19?

0 My treatment cannot help me at all

1 2 3 4 5 6 7 8 9

10 My treatment can help me very much

**F5.**

## How much do patients with COVID-19 experience symptoms from the illness?

[illegible]

**F6.**

How concerned are you about COVID-19?

**F7.**

How well do you feel you understand  
COVID-19?

[illegible]

**F8.**

How much does COVID-19 affect you emotionally?

0 it does not affect me emotionally at all

1 2 3 4 5 6 7 8 9

10 it extremely affects me emotionally



A horizontal Likert scale with 10 empty square boxes for rating, connected by a dashed line. The scale is labeled from 0 to 10 with descriptive text at the ends.

**F9. Please list below the three most important factors that you think are causes of COVID-19:**



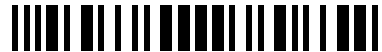

## Teil G: G – Demographics

Finally, we would like to ask you a few more questions about yourself and your living conditions.

**G1. What is your gender?**

- Male ☐
- Female ☐
- Divers ☐
- No answer ☐

**G2. How old are you? (Please enter years)**

**G3. In which country were you born?**

- Germany ☐
- Afghanistan ☐
- Iran ☐
- Iraq ☐
- Syria ☐
- Turkey ☐
- Morocco ☐
- Other country: ☐

Other country:

**G4. If you did not tick “Germany” in question 52: How long have you been living in Germany? (Please enter years)**

**G5. What is your mother tongue/first language?**

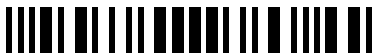

- German ☐
- Arabic ☐
- English ☐
- Farsi/Dari ☐
- French ☐
- Spanish ☐
- Turkish ☐
- Other language: ☐

Other language:

**G6. How many years did you attend school?**

- Not at all ☐
- Less than 10 years ☐
- 10 years ☐
- More than 10 years ☐

**G7. Where do you live?**

- In a rented apartment ☐
- In a condominium ☐
- In my own house ☐
- In a student hostel ☐
- In a shared apartment ☐
- In a community accommodation for refugees ☐

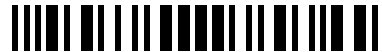

**G8. What is your residence status?**

- German citizenship ☐
- Permanent residence permit (Unbefristete Aufenthaltsgenehmigung) ☐
- Temporary residence permit (Befristete Aufenthaltsgenehmigung) ☐
- ongoing asylum procedure (Aufenthaltsgestattung) ☐
- temporary suspension of teportation (Duldung) ☐
- Other: ☐

Other:

**G9.**

How would you describe your current general state of health? It is...

very good      good      moderate      bad      very bad

☐ ..... ☐ ..... ☐ ..... ☐ ..... ☐

**Thank you for your participation in the survey!**

**If you want to take part in the raffle, please click on the link below.**
